# Supplementary material for: Enantioselective nucleophilic difluoromethylation of aromatic aldehydes with Me3SiCF2SO2Ph and PhSO2CF2H reagents catalyzed by chiral quaternary ammonium salts
Source: Beilstein J Org Chem. 2008 Jun 26;4:21. doi: 10.3762/bjoc.4.21 (PMC2486490; doi:10.3762/bjoc.4.21)
Supplement: File 1 — Full experimental details and compound characterization data for all new compounds described. [file Beilstein_J_Org_Chem-04-21-s001.doc]

**Enantioselective nucleophilic difluoromethylation of aromatic aldehydes with Me3SiCF2SO2Ph and PhSO2CF2H reagents catalyzed by chiral quaternary ammonium salts**

**Chuanfa Ni, Fang Wang and Jinbo Hu***

Key Laboratory of Organofluorine Chemistry, Shanghai Institute of Organic Chemistry, Chinese Academy of Sciences, 354 Fenglin Road, Shanghai 200032, China

[jinbohu@mail.sioc.ac.cn](mailto:jinbohu@mail.sioc.ac.cn)

**Supporting Information**

**1.1 Preparation of the chiral quaternary ammonium salts.**

The chiral quaternary ammonium salt **4** was prepared according to the reported procedure [1].

The chiral quaternary ammonium salts **6**–**8** were prepared from the corresponding cinchona alkaloids by refluxing with benzyl bromide or chloride in THF and filtration [1-4].

**2.1 General procedure for the asymmetric difluoromethylation reaction with PhSO2CF2H.**

**2.1.1. 2,2-Difluoro-1-phenyl-2-(phenylsulfonyl)ethanol (3a)** To a solution of benzaldehyde (**la**) (32 mg, 0.3 mmol), difluoromethyl phenyl sulfone (**5**) (48 mg, 0.25 mmol) and PTC **6a** (14 mg, 0.025 mmol) in toluene (1.5 mL) was added powdered KOH portion wise (56 mg, 1.0 mmol) at −40 °C. After the mixture was stirred at −40 °C for 48 h, the reaction mixture was quenched with 1N HCl (1.5 mL), and the mixture was extracted with ethyl acetate (10 mL X 3). The organic extracts were washed with brine and dried over MgSO4. Removal of the solvent followed by flash column chromatography of the residue (silica gel, hexane:AcOEt = 6:1) gave **4a** as a colorless solid (50 mg, 67%, 47% ee): [α]22D 19.5 (*c* = 0.8, CHCl3); ee was determined by HPLC analysis: CHIRALPAK AD-H, hexane:*i*-PrOH = 80:20, flow rate 0.7 mL/min, *t*major = 14.79 min, *t*minor = 16.42 min.

**2.1.2. 1-(4-Chlorophenyl)-2,2-difluoro-2-(phenylsulfonyl)ethanol (3b)**

1H NMR (300 MHz, CDCl3): δ 3.75 (s, 1H); 5.58 (d, *J* = 21 Hz, 1H); 7.33 (d, *J* = 8.4 Hz, 2H); 7.41 (d, *J* = 8.4 Hz, 2H); 7.56–7.76 (m, 3H); 7.96 (d, 7.6 Hz, 2H). 19F NMR (287 MHz, CDCl3): –104.1 (d, *J* =237 Hz, 1F); –119.2 (dd, *J* = 237 Hz, 21 Hz, 1F). MS (EI, *m/z*): 332 (M+), 143, 141, 113, 78, 77, 51, 44. The data are consistent with the ones previously reported [5]. [α]22D 23.7 (*c* = 1.05, CHCl3) (52% ee); ee was determined by HPLC analysis: CHIRALPAK OD, hexane:*i*-PrOH = 95:5, flow rate 0.7 mL/min, *t*major = 33.41 min, *t*minor = 39.03 min.

**2.1.3. 1-(2,4-Dichlorophenyl)-2,2-difluoro-2-(phenylsulfonyl)ethanol (3c)** White solid, mp 115–116 °C. [α]22D 36.6 (*c* = 1.05, CHCl3) (54% ee); ee was determined by HPLC analysis: CHIRALPAK AD-H, hexane:*i*-PrOH = 90:10, flow rate 0.7 mL/min, *t*minor = 26.88 min, *t*major = 27.84 min. 1H NMR (300 MHz, CDCl3): δ 3.45 (d, *J* = 1.5 Hz, 1H), 6.14 (dd, *J* = 21.5, 3.5 Hz, 1H), 7.31 (dd, *J* = 8.4, 1.8 Hz, 1H), 7.40 (d, *J* = 2.0 Hz, 1H), 7.60–7.70 (m, 3H), 7.80 (t, *J* = 7.5 Hz, 1H), 8.03 (d, *J* = 8.0 Hz, 2H). 19F NMR (287 MHz, CDCl3): δ –104.5 (d, *J* = 240 Hz, 1F), –120.6 (dd, *J* = 240, 23 Hz, 1F). 13C NMR (75 MHz, CDCl3): δ 66.7 (dd, *J* = 26, 19.4 Hz), 120.0 (dd, *J* = 300, 288 Hz), 127.6, 129.2, 129.5, 130.4, 130.7, 130.8, 132.3, 134.5, 135.8, 136.0. Anal. Calcd. for C14H10Cl2F2O3S: C, 45.79; H, 2.74. Found: C, 45.1; H, 3.17. MS (ESI, *m*/*z*): 389.0 (M+Na+). IR (KBr): 3488, 1585, 1472, 1344, 1334, 1159, 1122, 1090, 1002 cm-1.

**2.1.4. 1-(3-Chlorophenyl)-2,2-difluoro-2-(phenylsulfonyl)ethanol (3d).** White solid, mp 107–108 °C. [α]22D 15.7 (*c* = 0.95, CHCl3) (46% ee); ee was determined by HPLC analysis: CHIRALPAK AD-H, hexane:*i*-PrOH = 90:10, flow rate 0.7 mL/min, *t*major = 24.32 min, *t*minor = 29.59 min. 1H NMR (300 MHz, CDCl3): δ 3.46 (s, 1H), 5.54 (d, *J* = 21 Hz, 1H), 7.27–7.40 (m, 3H), 7.50 (s, 1H), 7.63 (t, *J* = 8.4 Hz, 2H), 7.74–7.82 (m, 1H), 8.00 (d, *J* = 7.3 Hz, 2H). 19F NMR (287 MHz, CDCl3): δ –104.3 (d, *J* = 228 Hz, 1F), –119.8 (dd, *J* = 228, 19.8 Hz, 1F). 13C NMR (75 MHz, CDCl3): δ 70.6 (dd, *J* = 26, 19 Hz), 120.0 (dd, *J* = 300, 288 Hz), 126.3, 128.2, 129.4, 129.6, 129.7, 130.7, 132.6, 134.4, 135.7, 135.8. Anal. Calcd. for C14H11ClF2O3S: C, 50.53; H, 3.33. Found: C, 50.84; H, 3.79. MS (ESI, *m*/*z*): 355.0 (M+Na+). IR (KBr): 3553, 1577, 1449, 1335, 1158, 1110 cm-1.

**2.1.5. 1-(2-Chlorophenyl)-2,2-difluoro-2-(phenylsulfonyl)ethanol (3e).** White solid, mp 104–105 °C. [α]22D 46.2 (*c* = 1.0, CHCl3) (64% ee); ee was determined by HPLC analysis: CHIRALPAK AD-H, hexane:*i*-PrOH = 90:10, flow rate 0.7 mL/min, *t*major = 28.61 min, *t*minor = 31.69 min. 1H NMR (300 MHz, CDCl3): δ 3.42 (s, 1H), 6.20 (d, *J* = 22 Hz, 1H), 7.28–7.41 (m, 3H), 7.64 (t, *J* = 7.9 Hz, 2H), 7.69–7.74 (m, 1H), 7.79 (t, *J* = 7.7 Hz, 1H), 8.05 (d, *J* = 7.8 Hz, 2H). 19F NMR (287 MHz, CDCl3): δ –104.3 (d, *J* = 238 Hz, 1F), –120.6 (dd, *J* = 238, 22 Hz, 1F). 13C NMR (75 MHz, CDCl3): δ 67.0 (dd, *J* = 26, 19 Hz), 120.3 (dd, *J* = 300, 290 Hz), 127.2, 129.4, 129.8, 130.6, 130.7, 131.8, 132.5, 133.8, 135.7. Anal. Calcd. for C14H11ClF2O3S: C, 50.53; H, 3.33. Found: C, 50.72; H, 3.73. MS (ESI, *m*/*z*): 355.0 (M+Na+). IR (KBr): 3480, 1478, 1452, 1443, 1338, 1317, 1155, 1122 cm-1.

**2.1.6. 2,2-Difluoro-1-(4-fluorophenyl)-2-(phenylsulfonyl)ethanol (3f).** White solid, mp 99–100 °C. [α]22D 16.4(*c* = 0.95, CHCl3) (41% ee); ee was determined by HPLC analysis: CHIRALPAK AD-H, hexane:*i*-PrOH = 95:5, flow rate 0.7 mL/min, *t*major = 49.67 min, *t*minor = 54.77 min. 1H NMR (300 MHz, CDCl3): δ 3.40 (d, *J* = 3.5 Hz, 1H), 5.58 (dt, *J* = 21, 2.6 Hz, 1H), 7.08 (t, *J* = 8.4 Hz, 2H), 7.63 (t, *J* = 7.8 Hz, 2H), 7.78 (t, *J* = 7.4 Hz, 1H), 8.00 (d, *J* = 8.0 Hz, 2H). 19F NMR (287 MHz, CDCl3): δ –104.5 (d, *J* = 238 Hz, 1F), –112.1 (m, 1F), –120.0 (dd, *J* = 238, 20 Hz, 1F). 13C NMR (75 MHz, CDCl3): δ 70.6 (dd, *J* = 26, 19 Hz), 115.5 (d, *J* = 22 Hz), 120.2 (t, *J* = 295 Hz), 129.4, 129.5 (d, *J* = 2.8 Hz), 130.0 (d, *J* = 8.3 Hz), 130.6, 132.6, 135.7, 163.1 (d, *J* = 248 Hz). Anal. Calcd. for C14H11F3O3S: C, 53.16; H, 3.51. Found: C, 53.11; H, 3.57. MS (ESI, *m*/*z*): 355.0 (M+Na+). IR (KBr): 3547, 1607, 1449, 1338, 1232, 1159, 1113 cm-1.

**2.1.7.** **1-(4-Bromophenyl)-2,2-difluoro-2-(phenylsulfonyl)ethanol (3g).** White solid, mp 107–108 °C. [α]22D 13.4 (*c* = 1,0, CHCl3) (36% ee); ee was determined by HPLC analysis: CHIRALPAK OD, hexane:*i*-PrOH = 98:2, flow rate 0.7 mL/min, *t*major = 94.99 min, *t*minor = 104.2 min. 1H NMR (300 MHz, CDCl3): δ 3.43 (d, *J* = 3.8 Hz, 1H), 5.55 (dt, *J* = 21, 3.2 Hz, 1H), 7.36 (d, *J* = 8.4 Hz, 2H), 7.52 (d, *J* = 8.4 Hz, 2H), 7.63 (t, *J* = 7.3 Hz, 2H), 7.78 (t, *J* = 7.3 Hz, 1H), 7.99 (d, *J* = 7.5 Hz, 2H). 19F NMR (287 MHz, CDCl3): δ –104.5 (d, *J* = 238 Hz, 1F), –119.8 (dd, *J* = 238, 22 Hz, 1F). 13C NMR (75 MHz, CDCl3): δ 70.7 (dd, *J* = 26, 19 Hz), 120.0 (dd, *J* = 300, 288 Hz), 123.8, 12.4, 129.8, 130.6, 131.6, 132.6, 132.8, 135.7. Anal. Calcd. for C14H11BrF2O3S: C, 44.58; H, 2.94. Found: C, 44.85; H, 3.09. MS (ESI, *m*/*z*): 398.9 (M[79Br]+Na+), 400.9 (M[81Br]+Na+). IR (KBr): 3525, 1490, 1451, 1334, 1314, 1159, 1112 cm-1.

**2.1.8. 2,2-Difluoro-2-(phenylsulfonyl)-1-[4-(trifluoromethyl)phenyl]ethanol (3h).** White solid, mp 95–96 °C. 36% ee. Ee was determined by HPLC analysis: CHIRALPAK AD-H, hexane:*i*-PrOH = 90:10, flow rate 0.7 mL/min, *t*major = 20.43 min, *t*minor = 21.46 min. 1H NMR (300 MHz, CDCl3): δ 3.56 (d, *J* = 3.8 Hz, 1H), 5.66 (dt, *J* = 21, 2.7 Hz, 1H), 7.57–7.70 (m, 6H), 7.79 (t, *J* = 7.4 Hz, 1H), 8.00 (d, *J* = 7.8 Hz, 2H). 19F NMR (287 MHz, CDCl3): δ –63.2(s, 3F), –104.5 (d, *J* = 240 Hz, 1F), –119.6 (dd, *J* = 240, 19.6 Hz, 1F). 13C NMR (75 MHz, CDCl3): δ 75.7 (dd, *J* = 27, 19 Hz), 120.0 (dd, *J* = 295, 290 Hz), 122.1 (q, *J* = 273 Hz), 125.3 (q, *J* = 3.7 Hz), 128.5, 129.5, 130.6, 131.5, 132.5, 135.8, 137.7. Anal. Calcd. for C15H11F5O3S: C, 49.18; H, 3.03. Found: C, 49.16; H, 3.09. MS (ESI, *m*/*z*): 389.0 (M+Na+). IR (KBr): 3512, 1453, 1327, 1157, 1112, 1064 cm-1.

**2.1.9. 2,2-Difluoro-2-(phenylsulfonyl)-1-*o*-tolylethanol (3i).** White solid, mp 93–95 °C. 11% ee. Ee was determined by HPLC analysis: CHIRALPAK OD, hexane:*i*-PrOH = 98:2, flow rate 0.7 mL/min, *t*minor = 21.68 min, *t*major = 25.85 min. 1H NMR (300 MHz, CDCl3): δ 2.37 (s, 3H), 3.25 (d, *J* = 3.2 Hz, 1H), 5.93 (dd, *J* = 22, 2.3 Hz, 1H), 7.14–7.31 (m, 3H), 7.62 (m, 3H), 7.77 (t, *J* = 7.5 Hz, 1H), 8.02 (d, *J* = 7.6 Hz, 2H). 19F NMR (287 MHz, CDCl3): δ –104.9 (d, *J* = 238 Hz, 1F), –120.2 (dd, *J* = 238, 23.5 Hz, 1F). 13C NMR (75 MHz, CDCl3): δ 19.3 (d, *J* = 2.8 Hz), 66.8 (dd, *J* = 27, 19.6 Hz), 120.7 (dd, *J* = 300, 288 Hz), 126.3, 127.9, 129.2, 129.4, 130.4, 130.7, 132.3, 132.6, 135.6, 136.7. Anal. Calcd. for C15H14F2O3S: C, 57.68; H, 4.52. Found: C, 57.64; H, 4.49. MS (ESI, *m*/*z*): 335.0 (M+Na+). IR (KBr): 3488, 1452, 1336, 1315, 1154, 1118, 996 cm-1.

**2.1.10. 2,2-Difluoro-1-(4-methoxyphenyl)-2-(phenylsulfonyl)ethanol (3j).** 1H NMR (300 MHz, CDCl3): δ 3.43 (d, *J* = 1.7 Hz, 1H); 3.78 (s, 1H); 5.52 (dt, *J* = 21 Hz, 3.3 Hz, 1H); 6.88 (d, *J* = 8.8 Hz, 2H); 7.39 (d, *J* = 8.8 Hz, 2H); 7.59 (t, *J* = 7.9 Hz, 2H); 7.74 (t, *J* = 7 Hz, 2H); 7.98 (d, *J*=7.5 Hz, 2H). 19F NMR (287 MHz, CDCl3): δ –103.9 (d, *J* = 239 Hz, 1F); –119.0 (dd, *J* = 239 Hz,*J* = 21 Hz, 1F). The data are consistent with the previous report [5]. 12% ee. Ee was determined by HPLC analysis: CHIRALPAK IC, hexane:*i*-PrOH = 95:5, flow rate 1.0 mL/min, *t*major = 45.51 min, *t*minor = 52.26 min.

**2.1.11. 1-(4-*tert*-Butylphenyl)-2,2-difluoro-2-(phenylsulfonyl)ethanol (3k).** 4% ee. Ee was determined by HPLC analysis: CHIRALPAK IC, hexane:*i*-PrOH = 95:5, flow rate 0.8 mL/min, *t*minor = 18.33 min, *t*major = 21.00 min.

**2.1.12. 2,2-Difluoro-1-(naphthalen-2-yl)-2-(phenylsulfonyl)ethanol (3l).** 1H NMR (300 MHz, CDCl3): δ 3.67 (s, 1H); 5.77 (d, *J* = 12 Hz, 1H); 7.35–8.15 (m, 12H). 19F NMR (287 MHz, CDCl3): δ –103.8 (d, 237 Hz, 1F); –121.5 (dd, *J* = 237 Hz, 21 Hz, 1F). The data are consistent with the previous report [6]. [α]22D 12.0 (*c* = 0.75, CHCl3) (23% ee); ee was determined by HPLC analysis: CHIRALPAK AD-H, hexane:*i*-PrOH = 80:20, flow rate 0.7 mL/min, *t*minor = 23.6 min, *t*major = 26.02 min.

**2.2 Determination of the absolute configuration of (+)-3a.**

To a solution of benzaldehyde (**la**) (255 mg, 2.4 mmol), difluoromethyl phenyl sulfone (**5**) (384 mg, 2.0 mmol) and PTC **6a** (110 mg, 0.20 mmol) in toluene (12 mL) was added powdered KOH portion wise (450 mg, 8.0 mmol) at −20 °C. After the mixture was stirred at −20 °C for 48 h, the reaction was quenched with 1N HCl (12 mL), and the mixture was extracted with ethyl acetate (20 mL x 3). The organic extracts were washed with brine and dried over MgSO4. Removal of the solvent followed by flash colunm chromatography of the residue (silica gel, hexane:AcOEt = 6:1) gave **3a** as a colorless solid (575 mg, 96%, 44% ee).

Into a 50 mL Schlenk flask containing a solution of (+)-**3a (**298 mg,1.0 mmol**)** in 11 mL DMF at room temperature was added 6 mL of a HOAc-NaOAc (1:1) buffer solution (8 mol/L). Magnesium turnings (360 mg, 15 mmol) were then added portion wise. The reaction mixture was stirred at room temperature for 3 h, followed by adding 30 mL water. The reaction mixture was extracted with Et2O (20 mL x 3), and the combined organic phase was washed with saturated aqueous NaHCO3 and brine, then dried over MgSO4. After the removal of the solvent, the crude product was purified by silica gel column chromatography using petroleum ether-ethyl acetate (6 : 1) as the eluent to give product **10** as a colorless oil, 148 mg (93% yield). 1H NMR (300 MHz, CDCl3): δ 2.56 (d, *J* = 4 Hz, 1H), 4.82 (m, 1H), 5.76 (td, *J* = 56, 4.7 Hz, 1H), 7.35–7.43 (m, 5H). 19F NMR (287 MHz, CDCl3): δ –127.4 (ddd, *J* = 283, 56, 10 Hz, 1F), –128.6 (ddd, *J* = 283, 56, 11.5 Hz, 1F). The data are consistent with the previous report [6]. [α]22D 7.8 (*c* = 0.6, CH2Cl2) (43% ee); ee was determined by HPLC analysis: CHIRALPAK IC, hexane:*i*-PrOH = 95:5, flow rate 0.8 mL/min, *t*minor = 6.68 min, *t*major = 7.38 min.

By comparing the rotation of our synthetic **9** with that reported for (*R*)-**9** ([α]24D –11.5 (*c* =1.0, CH2Cl2)) [7], we concluded that the configuration of (+)-**3a** is *S*.

**2.3 Determination of the absolute configuration of (+)-3b**–**h and (+)-3l** [8]**.**

As a typical example, determination of the absolute configuration of **3b**: To a solution of (R)-MTPA chloride in 0.3 mL anhydrous CH2Cl2 was added 3 mg of (+)-**3a**,0.015 mL Et3N and one crystal of DMAP. After 2 h of stirring, direct 19F NMR analysis was carried out. 19F NMR δ(CF3)major –72.4, δ(CF3)minor –72.8.

(+)-**3b** 19F NMR δ(CF3)major –72.4, δ(CF3)minor –72.9.

By comparing the Mosher's ester’s chemical shift of the main isomer, (+)-**3b** should have the same configuration as (+)-**3a**.

**References**

1. Caron, S.; Do, N. M.; Arpin, P.; Larivée, A. *Synthesis* **2003,** *11,* 1693–1698. doi:[10.1055/s-2003-40889](http://dx.doi.org/10.1055/s-2003-40889)
2. Arai, S.; Ishida, T.; Shioiri, T. *Tetrahedron Lett.* **1998,** *39,* 8299–8302. doi:[10.1016/S0040-4039(98)01811-5](http://dx.doi.org/10.1016/S0040-4039(98)01811-5)
3. Arai, S.; Tsuge, H.; Oku, M.; Miura, M.; Shioiri, T. *Tetrahedron* **2002,** *58,* 1623–1630. doi:[10.1016/S0040-4020(02)00028-5](http://dx.doi.org/10.1016/S0040-4020(02)00028-5)
4. Ku, J.-M.; Yoo, M.-S.; Park, H.; Jew, S.; Jeong, B.-S. *Tetrahedron* **2007,** *63,* 8099–8103. doi:[10.1016/j.tet.2007.06.012](http://dx.doi.org/10.1016/j.tet.2007.06.012)
5. Stahly, G. P. *J. Fluorine Chem.* **1989,** *43,* 53–66. doi:[10.1016/S0022-1139(00)81636-X](http://dx.doi.org/10.1016/S0022-1139(00)81636-X)
6. Prakash, G. K. S.; Hu, J.; Wang, Y.; Olah, G. A. *Eur. J. Org. Chem.* **2005,** 2218–2223. doi:[10.1002/ejoc.200500101](http://dx.doi.org/10.1002/ejoc.200500101)
7. Matsuda, T.; Harada, T.; Nakajima, N.; Itoh, T.; Nakamura, K. *J. Org. Chem.* **2000,** *65,* 157–163. doi:[10.1021/jo991283k](http://dx.doi.org/10.1021/jo991283k)
8. Gaspar, J.; Guerrero, A. *Tetrahedron: Asymmetry* **1995,** *6,* 231–238. doi:[10.1016/0957-4166(94)00379-P](http://dx.doi.org/10.1016/0957-4166(94)00379-P)
